# 1 Correlated decision making across multiple phases of olfactory guided search in *Drosophila*

2

3 Floris van Breugel<sup>1</sup>

4

5 <sup>1</sup>Dept. of Mechanical Engineering, Graduate Program for Neuroscience, Ecology, Evolution, and  
6 Conservation Biology, University of Nevada, Reno, NV 89557

7

## 8 **Abstract**

9

10 All motile organisms must search for food, often requiring the exploration of heterogeneous  
11 environments across a wide range of spatial scales. Recent field and laboratory experiments with the  
12 fruit fly, *Drosophila*, have revealed that they employ different strategies across these regimes, including  
13 kilometer scale straight-path flights between resource clusters, zig-zagging trajectories to follow odor  
14 plumes, and local search on foot after landing. However, little is known about the extent to which  
15 experiences in one regime might influence decisions in another. To determine how a flies' odor plume  
16 tracking during flight is related to their behavior after landing, I tracked the behavior of individually  
17 labelled fruit flies as they explored an array of three odor emitting, but food-barren, objects. The  
18 distance flies travelled on the objects in search of food was correlated with the time elapsed between  
19 their visits, suggesting that their in-flight plume tracking and on-foot local search behaviors are  
20 interconnected through a lossy memory-like process.

21

## 22 **Introduction**

23

24 All moving organisms spend a significant amount of their time and energy searching, be it for food,  
25 mates, or oviposition and nesting sites. Improving our knowledge of the algorithms that animals use  
26 during these search efforts represents a critical step towards understanding how organisms function  
27 by connecting neuroscience, behavior, ecology, and evolution [1]. On the behavior and ecology fronts,  
28 countless field studies have helped shape our understanding of the search behavior exhibited by  
29 mammals, birds, and fish in the context of optimal foraging theory and satisficing [2,3]. In laboratory  
30 environments designed to discover the neural basis underlying these decisions, many efforts have  
31 focused on olfactory search of organisms including mice [4], insects [5], and crustaceans [6] (for a  
32 review, see [7]). To move the field forward, there is a growing push to connect laboratory and field

33 experiments. Perhaps surprisingly, the unassuming fruit fly, *Drosophila melanogaster*, has emerged as a  
34 prime model for bridging this gap. Evidence is mounting that despite their numerically simple nervous  
35 systems, these creatures are capable of forming visual [8,9] and olfactory memories [10–12], and  
36 possess an internal representation of their compass heading with respect to visual cues [13–16]. How  
37 these adaptations are involved in search, however, remains an area of active research.

38

39 Most natural environments consist of a patchwork of potential resources with a fractal-like  
40 distribution, demanding multiple scales of search: long-range, intermediate, local, and nutrient driven.  
41 Long-range search for a *Drosophila* consists of flying up to 10 km across the desert to find a new oasis  
42 [17,18], initially relying on celestial cues [19,20], as well as vision and wind [21], until it catches an odor  
43 plume to follow [22,23]. Within the oasis a fly begins its intermediate search phase: tracking odor  
44 plumes [5,24–27] and approaching visual cues [22,28], often relying on the integration of the two to  
45 find a fermenting fruit [29,30]. After landing [31], the fly enters its third phase, local search. Now  
46 travelling on foot, the fly continues using odors to navigate the patchiness [32–34], as cracks in the  
47 skin serve as entry points, whereas mold renders portions too toxic [35]. After tasting some nutrients,  
48 the fly enters its final—nutrient driven—search phase, characterized by a so-called “dance” that is  
49 largely driven by idiothetic cues [36–38]. Whether or not the fly finds the nutrients it needs, eventually  
50 it will decide to take flight and leave, only to start the process all over again. While each of these phases  
51 of search has been subject to recent research efforts aimed at understanding both the behavior and  
52 neurobiology, little is known about how these individual phases are connected to one another, and  
53 how memories from one phase might influence the next.

54

55 In this paper I simulate a patchy environment by placing three ethanol-emitting objects in a wind  
56 tunnel. Individually marked fruit flies are allowed to freely explore these objects over the course of an  
57 18 hour period. My results indicate that their search behavior on each individual patch is correlated  
58 with the time elapsed between patch visits, suggesting that the intermediate and local phases of search  
59 are interconnected through a lossy memory-like process.

60

## 61 **Methods**

62

63 To discover the relationship between decisions flies make during local and intermediate search  
64 behaviors in patchy landscapes, I placed three food-barren odorous platforms in a wind tunnel (Fig.

65 1A-B, [5]). Each platform was set up to constantly emit the attractive odorant ethanol from the center  
66 of the platform by bubbling 60 mL/min of air through a 50% ethanol/water solution. The acrylic  
67 platforms had a perforated area in the center for emitting the odor, and were all identical in size, shape,  
68 color, odor type and concentration. The edge was coated in fluon to prevent the flies from crawling  
69 out of view.

70

71 To keep track of individual flies across all three platforms, I painted a dot of colored nail polish on  
72 their thorax (Fig. 1C). The flies were cold-anesthetized for the painting, and allowed to recover while  
73 being deprived of food, but not water, for 8 hours prior to the experiment start. For each experiment,  
74 I used six flies. They were placed in the wind tunnel 6 hours prior to their entrained dusk (relative to  
75 a 16:8 light:dark cycle), and allowed to move freely throughout the wind tunnel for 18 hours. When  
76 the flies landed on a platform, they were tracked by a machine-vision tracking system described  
77 previously [5], with one modification. Every 10 seconds, 18 megapixel color dSLR cameras positioned  
78 above each patch photographed the flies. All trajectories were hand-corrected for tracking errors to  
79 guarantee their completeness, and manually associated with the correct color identity from the dSLR  
80 images.

81

## 82 **Results**

83

84 In a stereotypical search-bout, flies would spend a significant amount of time near the odor source in  
85 the center of the platform, while also making periodic forays towards the edge, often circling the  
86 perimeter of the object (Fig. 1D). To quantify their behavior, I focused on the distance the flies  
87 travelled during their search, rather than the time they spent as was been done previously [5] (see  
88 Discussion for rationale).

89

90 The first time the flies' encountered an odor emitting platform, they walked a significantly larger  
91 distance compared to the average of their subsequent encounters, provided that they engaged with the  
92 odor during that first encounter (Fig. 1E-F). These results suggest that flies might maintain some form  
93 of memory about their failure to find food in order to minimize the time wasted on future fruitless  
94 search endeavors. But does this "memory" fade with time? To further investigate this hypothesis, I  
95 analyzed their behavior at a more granular scale by comparing the distance travelled to the time elapsed  
96 before (pre-interval), and after (post-interval), visiting additional platforms (Fig. 2A).

97 Most of the flies explored the odorous patches numerous times, often returning to the same patch  
98 several times in a row. Intervals between visits ranged from less than a second, to 16 hours. The  
99 distance the flies travelled on the platform while searching is, on a log-log scale, correlated with the  
100 time elapsed since they last visited a platform (Fig. 2B). Though significant ( $p=4\times 10^{-5}$ ), the positive  
101 correlation only explains about 10% of the variance ( $R^2=0.1$ ). The unexplained variance, however, is  
102 positively correlated with the amount of time until their next patch encounter (post-interval) (Fig. 2C).  
103 That is, if flies walk for a smaller distance than predicted based on their pre-interval, then their post-  
104 interval is likely small as well, allowing them to make up for the missed opportunities. Relating the  
105 distance travelled on the platform to the mean of the pre- and post-intervals resulted in a stronger  
106 positive correlation than either alone ( $p=2.6\times 10^{-8}$ ;  $R^2=0.17$ ) (Fig. 2D). To ensure that no individual  
107 flies played an outsize role in this conclusion, I recalculated the correlation from Fig. 2D in the case  
108 where as many as five (32%) random flies were left out of the analysis. The largest p-value for this  
109 resampling analysis was  $4\times 10^{-5}$ , indicating that our conclusion is not biased by a small subpopulation.

110

111 There was no correlation between distance travelled and time of day ( $p=0.38$ , Supp. Fig. 1A),  
112 indicating that neither hunger nor circadian rhythm were important factors. Instead, these factors  
113 likely determine whether the flies initiate take off and plume tracking. I also did not find a correlation  
114 between pre- and post-interval times ( $p=0.23$ , Supp. Fig. B), suggesting there are no consistent  
115 behavioral sequences such as rapidly flitting between platforms.

116

## 117 **Discussion**

118

119 My results indicate that search behavior across different search phases—intermediate scale plume  
120 tracking and local search on foot—is inter-connected. These observations raise several discussion  
121 points: (1) what internal mechanism is responsible for giving rise to the time-interval correlation (e.g.  
122 an interval timer, sensory adaptation, or habituation); (2) what mechanism drives flies' decision to  
123 leave a patch; and (3) in what ecological contexts is their behavior advantageous.

124

### 125 *Mechanisms that could give rise to a measure of time-interval*

126

127 Although a number of models for neural encoding of interval-timing have been proposed [39], there  
128 is little experimental evidence for minute to hour scale interval-timing. In rats, extended time sense is

129 encoded in the hippocampus [40–42]. However, the accuracy is modulated by drugs, hormones, and  
130 context [43,44]. For insects, the ability to measure time-intervals on the scale of seconds to minutes is  
131 open for debate. Parasitoid wasps are capable of learning time intervals [45,46]. Honeybees, however,  
132 are not [47,48]. Although their cousins, bumblebees, have been shown to learn fixed time intervals  
133 [49], the analysis has been called into question [47]. Instead, their behavior suggests that they may have  
134 learned a different strategy that approximates interval timing.

135  
136 The challenges of reliably encoding time in the nervous system suggest that alternate mechanisms are  
137 either wholly, or in part, responsible for giving rise to the observed correlation. One possibility is  
138 sensory adaptation, however, this is unlikely given that peripheral olfactory receptor level adaptation  
139 occurs on much faster time scales (~0.5 second [50]) compared to the observed behavior. Instead,  
140 habituation is a more likely explanation. Prior experiments with ethanol induced startle responses  
141 indicate that habituated responses are attenuated on the time scales of 15-30 minutes [51].

142  
143 *Mechanisms driving the decision to leave*

144  
145 In ecology, the process of search has been dominated by the field of optimal foraging theory, namely,  
146 the Marginal Value Theorem [2] [52] [53] and satisficing [3]. Neither model, however, provides an  
147 explanation for the underlying neural mechanisms. A number of “rules of thumb” have been proposed  
148 [54,55]. One example is the Threshold Giving Up Time (TGUT) strategy [56] [57]), which states that  
149 an animal should continue searching for food in a patch for an amount of time proportional to the  
150 quality of the patch. However, because maintaining an accurate sense of time elapsed is challenging, a  
151 more likely strategy for insects is to leave after some Threshold Giving Up Distance-travelled (TGUD)  
152 has been reached, given the behavioral and neural evidence for insects’ ability to count steps [37,58].  
153 Assuming some variability, a TGUD algorithm should result in a unimodal distribution of distances  
154 travelled, but the shape of that distribution could be either normal, or something with a heavier tail  
155 such as a lognormal, or levy distribution. An even simpler heuristic for deciding when to leave a patch  
156 was proposed in the context of jumping spiders, termed Fixed Probability of Leaving (FPL) [59],  
157 where the animal does not need to keep track of time (or distance) and instead leaves with a fixed  
158 probability at each time step (or physical step). An FPL strategy would result in an exponential  
159 distribution, where the likelihood of leaving after a short distance travelled is very high, falling off  
160 exponentially.

161

162 Can flies' decision to leave be modeled by either the TGUD or FPL strategy? A close look at the  
163 distribution of distance travelled suggests that although their behavior is not consistent with an  
164 exponential distribution it is consistent with both gamma and lognormal distributions, with parameters  
165 that vary as a function of the intervals between visits (Fig. 2E-F). At first glance, these results appear  
166 to favor the TGUD model, however, a gamma distribution is equivalent to a sum of exponential  
167 distributions. Thus, a simple alternative is that the fly has multiple FPL-like processes operating  
168 together, which I term Gamma Probability of Leaving (GPL). To distinguish between the TGUD and  
169 GPL models will require connecting the behavior with neural activity.

170

171 *Ecological context for time-interval correlated search*

172

173 What advantages might a correlation between intermediate and local search behaviors confer? I  
174 propose two hypotheses. First, the fly might form a memory, associating the odor with a low likelihood  
175 of finding food, thereby improving search efficiency. However, these relationships might change with  
176 the environment and season, so it would make sense for such a memory to revert to an innate value  
177 over time. The second hypothesis is that their behavior optimizes search in non-homogeneous  
178 environments, where potential resources are clustered in groups separated by larger distances. In this  
179 case, it would make sense to tailor search time relative to the ease with which a new potential food  
180 source can be found. Distinguishing between the memory and unpredictable environment hypotheses  
181 will require experiments that manipulate the memories formed by providing food rewards or  
182 manipulating the release of neuromodulators such as dopamine.

183

184

185 **Figures**

186

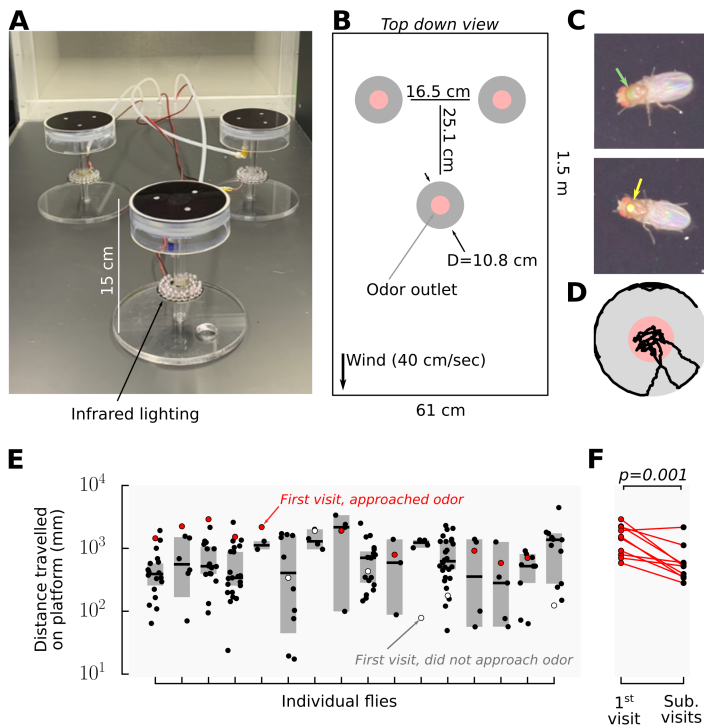

187

188 **Fig. 1 | Flies explore odorous objects longer on their first encounter.** (A) Photograph of experimental arrangement

189 of three odor emitting platforms inside a 60x60x120 cm<sup>3</sup> wind tunnel. Above each platform was a machine vision camera

190 to track the flies' walking trajectories, and a digital SLR to image their markings. (B) Top down diagram of experimental

191 arrangement, red shading indicates approximate region where ethanol odor was emitted, see [5]. (C) Representative

192 photographs of flies indicating their identifying color spots painted on with nail polish. (D) Representative trajectory on

193 one platform. (E) Distance travelled on the platform by individual flies, shading indicates 95% confidence interval about

194 the mean of all visits after the first one. (F) When flies approached the odor on their first visit, they covered more ground

195 than on average during their subsequent visits (paired T-test;  $t=4.56$ ;  $p=0.001$ ).

196

197

198

199

200

201

202

203

204

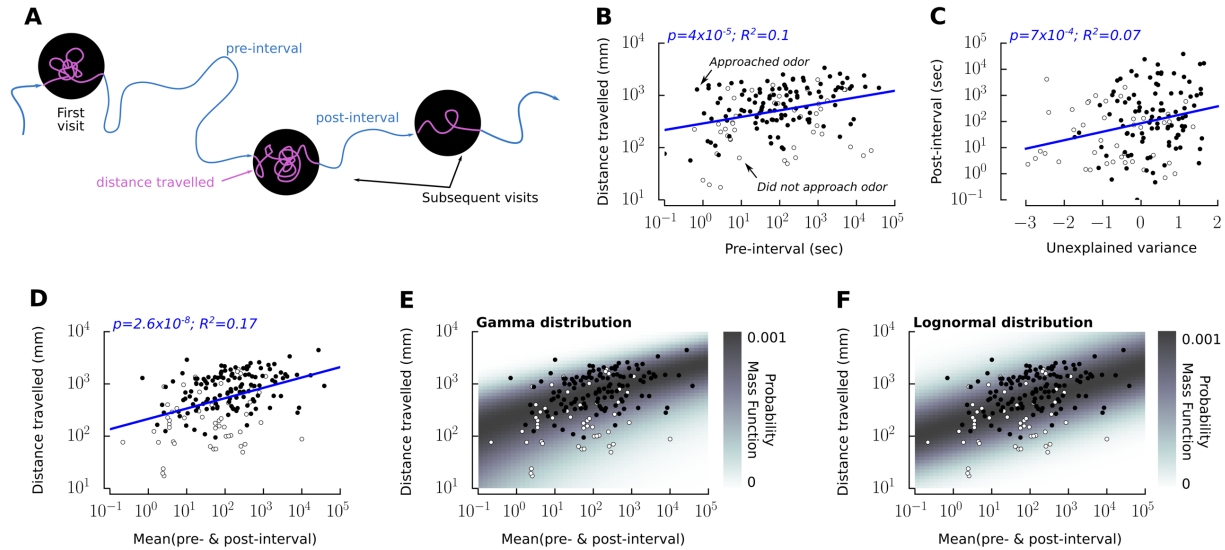

205

206

207 **Fig. 2 | When flies explore an odorous, but food-barren, object, the distance they travel on the object is**  
 208 **proportional to the time elapsed since their last visit to a similar object.** (A) Cartoon of a hypothetical sequence of  
 209 visits to three odor emitting patches. (B) Distance flies travel on the platform as a function of the time elapsed since their  
 210 last visit to the same, or different, platform. Black and white colored dots indicate flies that either approached, or did not  
 211 approach, the odor during that particular visit, respectively. Blue line shows the linear regression, including all data.  
 212 Excluding flies that did not approach the odor does not change the statistics in any meaningful way. (C) Post-interval time  
 213 as a function of the difference between the data and linear regression from B. (D) Relating distance travelled to the mean  
 214 of the pre- and post-intervals improves the strength of the correlation, plotted as in B. The data in D is well modelled by  
 215 either a gamma (E), or lognormal (F) distribution, with shape and scale parameters that vary with the abscissa.

216

217

218

219

220

221

222

223

224

225

226

227

228



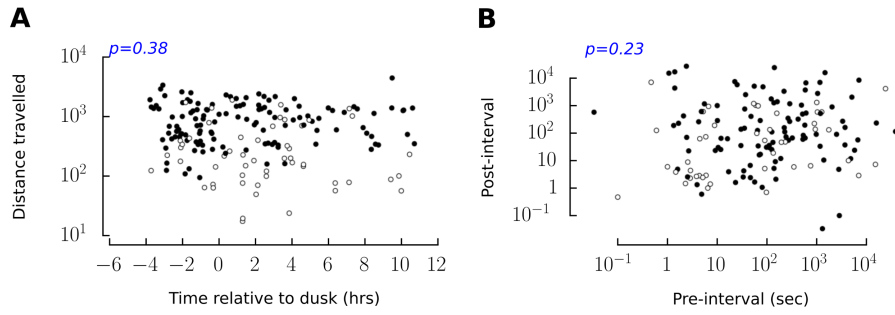

229

230

231

232

**Supp. Fig. 1** (A) Distance travelled on the platform is not correlated with time of day ( $p=0.38$ ). (B) Pre- and post-intervals are not correlated with one another ( $p=0.23$ ). Black and white colored dots indicate flies that either approached, or did not approach the odor during that particular visit.

233 **Acknowledgements**

234

235 Many of the ideas presented here originated while I was working in the lab of M H Dickinson, and  
236 the experiments were performed in a wind tunnel supported by Jeff Riffell's National Science  
237 Foundation grant (NSF-1626424). I am grateful for the help in analyzing trajectories done by two  
238 undergraduates at UNR, Zachary Dugan and Darreann Carmela Hailey, and feedback on the  
239 manuscript from Jeff Riffell. The research was supported by a Moore/Sloan Data Science and  
240 Washington Research Foundation Innovation in Data Science Postdoctoral Fellowship, a Sackler  
241 Scholarship in Biophysics, and the National Institute of General Medical Sciences of the National  
242 Institutes of Health (P20GM103650).

243

244

245 **References**

246

- 247 [1]. Hein, A.M., Carrara, F., Brumley, D.R., *et al.* (2016). *PNAS* *113*, 9413–9420.
- 248 [2]. Charnov, E.L. (1976). *Theor. Popul. Biol.* *9*, 129–136.
- 249 [3]. Carmel, Y. and Ben-Haim, Y. (2005). *Am. Nat.* *166*, 641.
- 250 [4]. Findley, T.M., Wyrick, D.G., Cramer, J.L., *et al.* (2020). *bioRxiv May*, 1–38.
- 251 [5]. Breugel, F. Van, Huda, A. and Dickinson, M.H. (2018). *Nature* *564*, 420–424.
- 252 [6]. Michaelis, B.T., Leathers, K.W., Bobkov, Y. V., *et al.* (2020). *Sci. Rep.* *10*, 1–11.
- 253 [7]. Baker, K.L., Dickinson, M., Findley, T.M., *et al.* (2018). *J. Neurosci.* *38*, 9383–9389.
- 254 [8]. Wang, Z., Pan, Y., Li, W., *et al.* (2008). *Learn. Mem.* *15*, 133–142.
- 255 [9]. Ofstad, T.A., Zuker, C.S. and Reiser, M.B. (2011). *Nature* *474*, 204–7.
- 256 [10]. Guo, J. and Guo, A. (2005). *Science* *309*, 307–10.
- 257 [11]. Oswald, D. and Waddell, S. (2015). *Curr. Opin. Neurobiol.* *35*, 178–184.
- 258 [12]. Zars, T., Fischer, M., Schulz, R., *et al.* (2000). *Science* (80-. ). *288*, 672–675.
- 259 [13]. Fisher, Y.E., Lu, J., D’Alessandro, I., *et al.* (2019). *Nature*.
- 260 [14]. Kim, S.S., Hermundstad, A.M., Romani, S., *et al.* (2019). *Nature*, 1–6.
- 261 [15]. Haberkern, H., Basnak, M.A., Ahanonu, B., *et al.* (2019). *Curr. Biol.* *29*, 1647-1659.e8.
- 262 [16]. Giraldo, Y.M., Leitch, K.J., Ros, I.G., *et al.* (2018). *Curr. Biol.* *28*, 2845-2852.e4.
- 263 [17]. Coyne, J.A., Boussy, I.A., Prout, T., *et al.* (1982). *Am. Soc. Nat.* *119*, 589–595.
- 264 [18]. Jones, J.S., Bryant, S.H., Lewontin, R.C., *et al.* (1981). *Genetics* *98*, 157–178.
- 265 [19]. Warren, T.L., Giraldo, Y.M. and Dickinson, M.H. (2019). *J. Exp. Biol.* *222*.
- 266 [20]. Weir, P.T. and Dickinson, M.H. (2012). *Curr. Biol.* *22*, 21–7.
- 267 [21]. Leitch, K.J., Ponce, F., van Breugel, F., *et al.* (2020). *bioRxiv June*.
- 268 [22]. Van Breugel, F. and Dickinson, M.H. (2014). *Curr. Biol.* *24*, 274–286.
- 269 [23]. Budick, S.A. and Dickinson, M.H. (2006). *J. Exp. Biol.* *209*, 3001–17.
- 270 [24]. Dweck, H.K.M., Ebrahim, S.A.M., Kromann, S., *et al.* (2013). *Curr. Biol.* *23*, 2472–2480.
- 271 [25]. Hallem, E.A. and Carlson, J.R. (2006). *Cell* *125*, 143–160.
- 272 [26]. Becher, P.G., Flick, G., Rozpedowska, E., *et al.* (2012). *Funct. Ecol.* *26*, 822–828.
- 273 [27]. Mansourian, S., Enjin, A., Jirle, E. V., *et al.* (2018). *Curr. Biol.* *28*, 3960-3968.e3.
- 274 [28]. Saxena, N., Natesan, D. and Sane, S.P. (2018). *J. Exp. Biol.* *221*, jeb172023.
- 275 [29]. Cheng, K.Y., Colbath, R.A. and Frye, M.A. (2019). *Curr. Biol.* *29*, 2058-2065.e2.
- 276 [30]. Van Breugel, F., Riffell, J., Fairhall, A., *et al.* (2015). *Curr. Biol.* *25*, 2123–2129.

- 277 [31]. Breugel, F. Van and Dickinson, M.H. (2012). 1783–1798.
- 278 [32]. Tao, L., Ozarkar, S. and Bhandawat, V. (2020). *PLoS Comput. Biol.* *16*, 1–26.
- 279 [33]. Jung, S.-H., Hueston, C. and Bhandawat, V. (2015). *Elife* *4*, 1–31.
- 280 [34]. Gaudry, Q., Hong, E.J., Kain, J., *et al.* (2013). *Nature* *493*, 424–428.
- 281 [35]. Stensmyr, M.C., Dweck, H.K.M., Farhan, A., *et al.* (2012). *Cell* *151*, 1345–57.
- 282 [36]. Dethier, V.G. (1957). *Science* (80-.). *125*.
- 283 [37]. Kim, I.S. and Dickinson, M.H. (2017). *Curr. Biol.* *27*, 2227–2238.
- 284 [38]. Corfas, R.A., Sharma, T. and Dickinson, M.H. (2019). *Curr. Biol.* *29*, 1660-1668.e4.
- 285 [39]. Tallot, L. and Doyère, V. (2020). *Neurosci. Biobehav. Rev.*, pre-proof.
- 286 [40]. Mankin, E.A., Diehl, G.W., Sparks, F.T., *et al.* (2015). *Neuron* *85*, 190–201.
- 287 [41]. Mankin, E.A., Sparks, F.T., Slayyeh, B., *et al.* (2012). *Proc. Natl. Acad. Sci. U. S. A.* *109*,
- 288 19462–19467.
- 289 [42]. Rubin, A., Geva, N., Sheintuch, L., *et al.* (2015). *Elife* *4*, 1–16.
- 290 [43]. Meck, W.H. (1983). *J. Exp. Psychol.* *9*, 171–201.
- 291 [44]. Penney, T.B., Allan, L.G., Meck, W.H., *et al.* (1998). In *Timing of behavior: Neural,*
- 292 *psychological and computational perspectives*, C. E. C. D.A. Rosenbaum, ed. (MIT Press),
- 293 pp. 165–193.
- 294 [45]. Parent, J., Takasu, K., Brodeur, J., *et al.* (2017). *Behav. Ecol.* *28*, 640–644.
- 295 [46]. Parent, J., Brodeur, J. and Boivin, G. (2016). *Ecol. Entomol.* *41*, 727–732.
- 296 [47]. Philip, D., Craig, A., Varnon, C.A., *et al.* (2014). *PLoS One* *9*.
- 297 [48]. Grossmann, K.E. (1973). *J. Exp. Anal. Behav.* *20*, 105–109.
- 298 [49]. Boisvert, M.J. and Sherry, D.F. (2006). 1636–1640.
- 299 [50]. Bell, J.S. and Wilson, R.I. (2016). *Neuron* *91*, 425–438.
- 300 [51]. Cho, W., Heberlein, U. and Wolf, F.W. (2004). *Genes. Brain. Behav.* *3*, 127–137.
- 301 [52]. Schoener, T.W. (1971). *Annu. Rev. Ecol. Syst.* *2*, 369–404.
- 302 [53]. Nonacs, P. (2001). *Behav. Ecol.* *12*, 71–83.
- 303 [54]. Iwasa, Y.O.H., Higashi, M. and Yamamura, N. (1981). *Am. Nat. Nat.* *117*, 710–723.
- 304 [55]. Green, R.F. (1984). *Am. Nat.* *123*, 30–43.
- 305 [56]. McNair, J.N. (1982). *Am. Nat.* *119*, 511–529.
- 306 [57]. Croze, H. (1970). (Parey).
- 307 [58]. Wittlinger, M., Wehner, R. and Wolf, H. (2006). *Science* (80-.). *312*, 1965–1967.
- 308 [59]. Kareiva, P., Morse, D.H. and Eccleston, J. (1989). *Oecologia* *78*, 542–549.
